# Supplementary material
Source: PubMed Central journal article supplement (PMC3687697)
Supplement: supp_126.12.2607_JCS116269.pdf [file supp_126.12.2607_JCS116269.pdf]

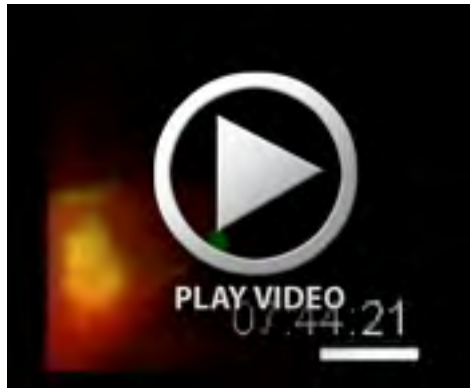

**Movie 1. Time-lapse movie of gap junction plaque endoexocytosis seen in Fig. 4B.** The invagination of the gap junction plaque (Cx43-GFP) is seen over time to result in the release of an annular gap junction. The two adjacent cells are expressing Cx43-GFP; however, only one is expressing clathrin-mCherry (which helps to define the boundaries of that cell). The annular gap junction is released into a cell that is not expressing the clathrin-mCherry. During the 10-hour viewing period, images were collected every 2 minutes.

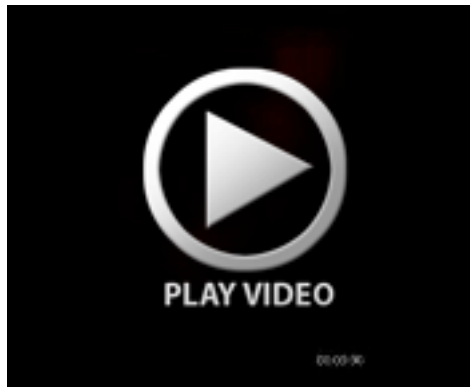

**Movie 2. Time-lapse movie of gap junction plaque endoexocytosis in the DMSO control population, seen in Fig. 5A.** Images were collected every 2 minutes.

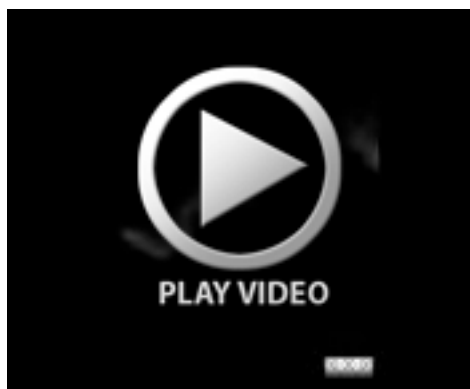

**Movie 3. Time-lapse movie of gap junction plaque endoexocytosis in the dynasore treated population, seen in Fig. 5B.** Images were collected every 2 minutes.

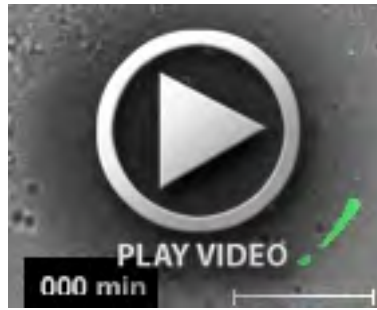

**Movie 4. Time-lapse movie demonstrating the recovery from dynasore inhibition of internalization, seen in Fig. 6.** Images were collected every 1 minute. There was a shift in the position of the stage at the point that dynasore was added ( $t=30$  minutes). Dynasore was washed out and new growth media was added at  $t=90$  minutes).

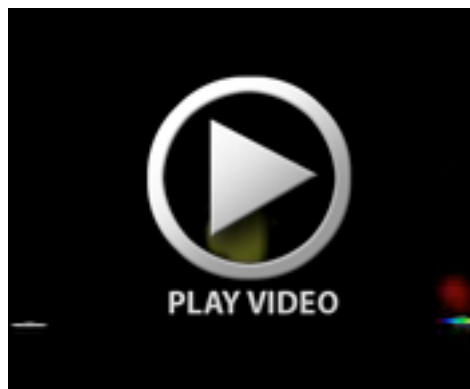

**Movie 5. Time-lapse imaging and tracking of annular gap junction vesicle fission in the DMSO control cell, seen in Fig. 7H.** Images were collected every 1 minute.

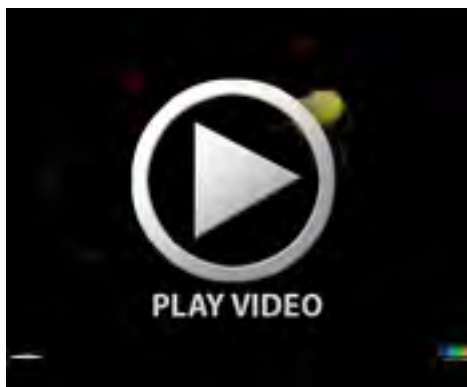

**Movie 6. Time-lapse imaging and tracking of annular gap junction vesicle fission in the dynasore treated cell, seen in Fig. 7I.** Images were collected every 1 minute.
